# Supplementary material for: Genome-Wide Identification and Analysis of Grape Aldehyde Dehydrogenase (ALDH) Gene Superfamily
Source: PLOS journal article supplement (doi:10.1371/journal.pone.0032153), 2012-02-15
Supplement: S1 (10.1371/journal.pone.0032153.s001) [file journal.pone.0032153.s001]

**A**

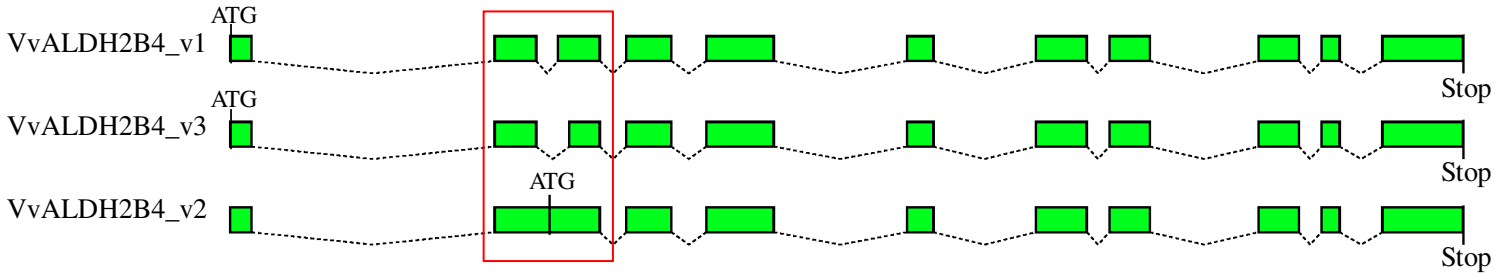

**B**

|              |                                                                                    |     |
|--------------|------------------------------------------------------------------------------------|-----|
| VvALDH2B4_v1 | ATGGCGGCTAGGAGGATCTCCTCGTTGCTCTCTCGTTCTCTCTCTGCTCTTCTGCTTTTTCTCTTTCTCTAGGCCAAAA    | 80  |
| VvALDH2B4_v3 | ATGGCGGCTAGGAGGATCTCCTCGTTGCTCTCTCGTTCTCTCTCTGCTCTTCTGCTTTTTCTCTTTCTCTAGGCCAAAA    | 80  |
| VvALDH2B4_v2 | ATGGCGGCTAGGAGGATCTCCTCGTTGCTCTCTCGTTCTCTCTCTGCTCTTCTGCTTTTTCTCTTTCTCTAGGCCAAAA    | 80  |
|              |                                                                                    |     |
| VvALDH2B4_v1 | TTTCAACAGAGGGAAAAGCATCCATCGCTTTAGCACTGCAGCAGCAGCAGCAGTGAAGAAGCTCATCACTCCAACCTGTTTC | 160 |
| VvALDH2B4_v3 | TTTCAACAGAGGGAAAAGCATCCATCGCTTTAGCACTGCAGCAGCAGCAGCAGTGAAGAAGCTCATCACTCCAACCTGTTTC | 160 |
| VvALDH2B4_v2 | TTTCAACAGAGGGAAAAGCATCCATCGCTTTAGCACTGCAGCAGCAGCAGCAGTGAAGAAGCTCATCACTCCAACCTGTTTC | 160 |
|              |                                                                                    |     |
| VvALDH2B4_v1 | AGATAAATTACACTCAACTTCTAATTAATGGGCAATTTGTAGATGCAGCATCGG.....                        | 214 |
| VvALDH2B4_v3 | AGATAAATTACACTCAACTTCTAATTAATGGGCAATTTGTAGATGCAGCATCGG.....                        | 214 |
| VvALDH2B4_v2 | AGATAAATTACACTCAACTTCTAATTAATGGGCAATTTGTAGATGCAGCATCGGTAATCATTGTTGGGCAATGTT        | 240 |
|              |                                                                                    |     |
| VvALDH2B4_v1 | .....GAAAAACATTCCCCACCTTTGACCCTCGCAGG                                              | 246 |
| VvALDH2B4_v3 | .....                                                                              | 214 |
| VvALDH2B4_v2 | TCCATCATTAAATGAATCATGTATGAAACCGATGTCGGTATCATTACAGGAAAAACATTCCCCACCTTTGACCCTCGCAGG  | 320 |
|              |                                                                                    |     |
| VvALDH2B4_v1 | GGAGAAGTGATTGCTAATGTTGCAGAAGGTGATGCAGAAGATATCAATCGGGCAGTGTCCGCTGCTCGAAAGGCGTTTGA   | 326 |
| VvALDH2B4_v3 | .....TGATTGCTAATGTTGCAGAAGGTGATGCAGAAGATATCAATCGGGCAGTGTCCGCTGCTCGAAAGGCGTTTGA     | 287 |
| VvALDH2B4_v2 | GGAGAAGTGATTGCTAATGTTGCAGAAGGTGATGCAGAAGATATCAATCGGGCAGTGTCCGCTGCTCGAAAGGCGTTTGA   | 400 |
|              |                                                                                    |     |
| VvALDH2B4_v1 | TGAAGGACCATGGCCAAGGATGAGCCCCCTATGAAAGGTCGCGGATATTGTTGCGGTTTGCTGATTTAGCCGAGAAACACA  | 406 |
| VvALDH2B4_v3 | TGAAGGACCATGGCCAAGGATGAGCCCCCTATGAAAGGTCGCGGATATTGTTGCGGTTTGCTGATTTAGCCGAGAAACACA  | 367 |
| VvALDH2B4_v2 | TGAAGGACCATGGCCAAGGATGAGCCCCCTATGAAAGGTCGCGGATATTGTTGCGGTTTGCTGATTTAGCCGAGAAACACA  | 480 |
|              |                                                                                    |     |
| VvALDH2B4_v1 | ATGATGAGCTTGCAGCTCTA                                                               | 426 |
| VvALDH2B4_v3 | ATGATGAGCTTGCAGCTCTA                                                               | 387 |
| VvALDH2B4_v2 | ATGATGAGCTTGCAGCTCTA                                                               | 500 |

**Figure S1** Alternatively spliced transcripts of *VvALDH2B4*. (A) Exon-intron structure of alternatively spliced transcripts of *VvALDH2B4*; (B) Alignment of the 5'-open reading frame (ORF) sequences of the three alternative splice variants of *VvALDH2B4*. Translational initiation sites are marked with blue boxes. The 113 bp retained intron of *VvALDH2B4\_v2* causes a frame shift in translation and a different translational initiation site.
